# Supplementary material for: Compact graphical representation of phylogenetic data and metadata with GraPhlAn
Source: PeerJ journal article supplement (doi:10.7717/peerj.1029), 2015-06-18

- HIGH O2
- LOW O2
- MID O2

# HMP aerobiosis

- A: Erysipelotrichaceae
- B: Coprobacillus
- C: Clostridiales
- D: Ruminococcaceae
- E: Faecalibacterium
- F: Anaerotruncus
- G: Sporobacter
- H: Butyricicoccus
- I: Ruminococcus
- J: Subdoligranulum
- K: Oscillibacter
- L: Incertae Sedis XIV
- M: Blautia
- N: Incertae Sedis XI
- O: Anaerococcus
- P: Lachnospiraceae
- Q: Coprococcus
- R: Anaerostipes
- S: Dorea
- T: Roseburia
- U: Phascolarctobacterium
- V: Lactobacillales
- W: Bacillales
- X: Staphylococcaceae
- Y: Staphylococcus
- Z: Bacteroidales
- a: Rikenellaceae
- b: Alistipes
- c: Bacteroides
- d: Porphyromonadaceae
- e: Parabacteroides
- f: Actinomycetales
- g: Propionibacteriaceae
- h: Propionibacterium
- i: Actinomycetaceae
- j: Corynebacteriaceae
- k: Corynebacterium
- l: Pseudomonadales
- m: Burkholderiales
- n: Alcaligenaceae
- o: Parasutterella

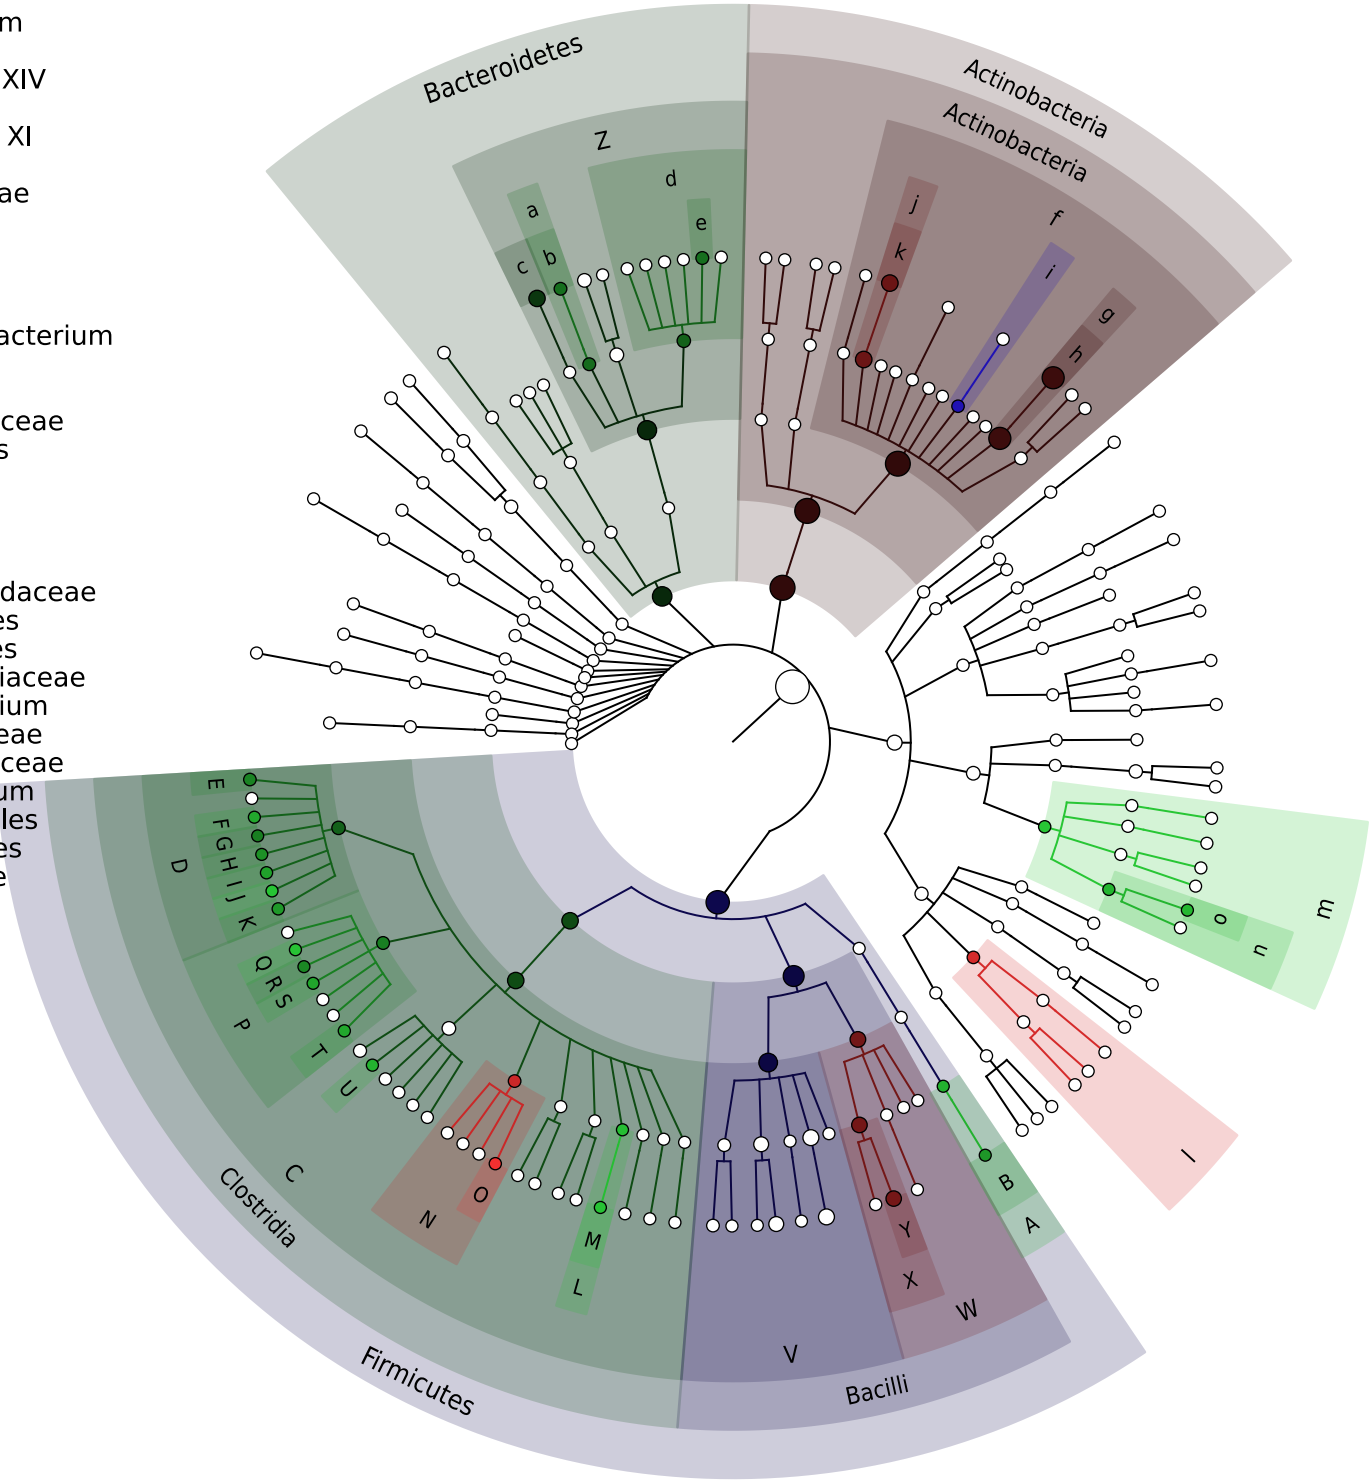

Supplement: FigS1.pdf [file FigS1.pdf]
