# Supplementary material for: Compact graphical representation of phylogenetic data and metadata with GraPhlAn
Source: PeerJ journal article supplement (doi:10.7717/peerj.1029), 2015-06-18

A:Streptococcus  
B:Lactobacillaceae

# Saliva microbiome

- ACTINOBACTERIA
- BACTEROIDETES
- FIRMICUTES
- PROTEOBACTERIA
- SPIROCHAETES

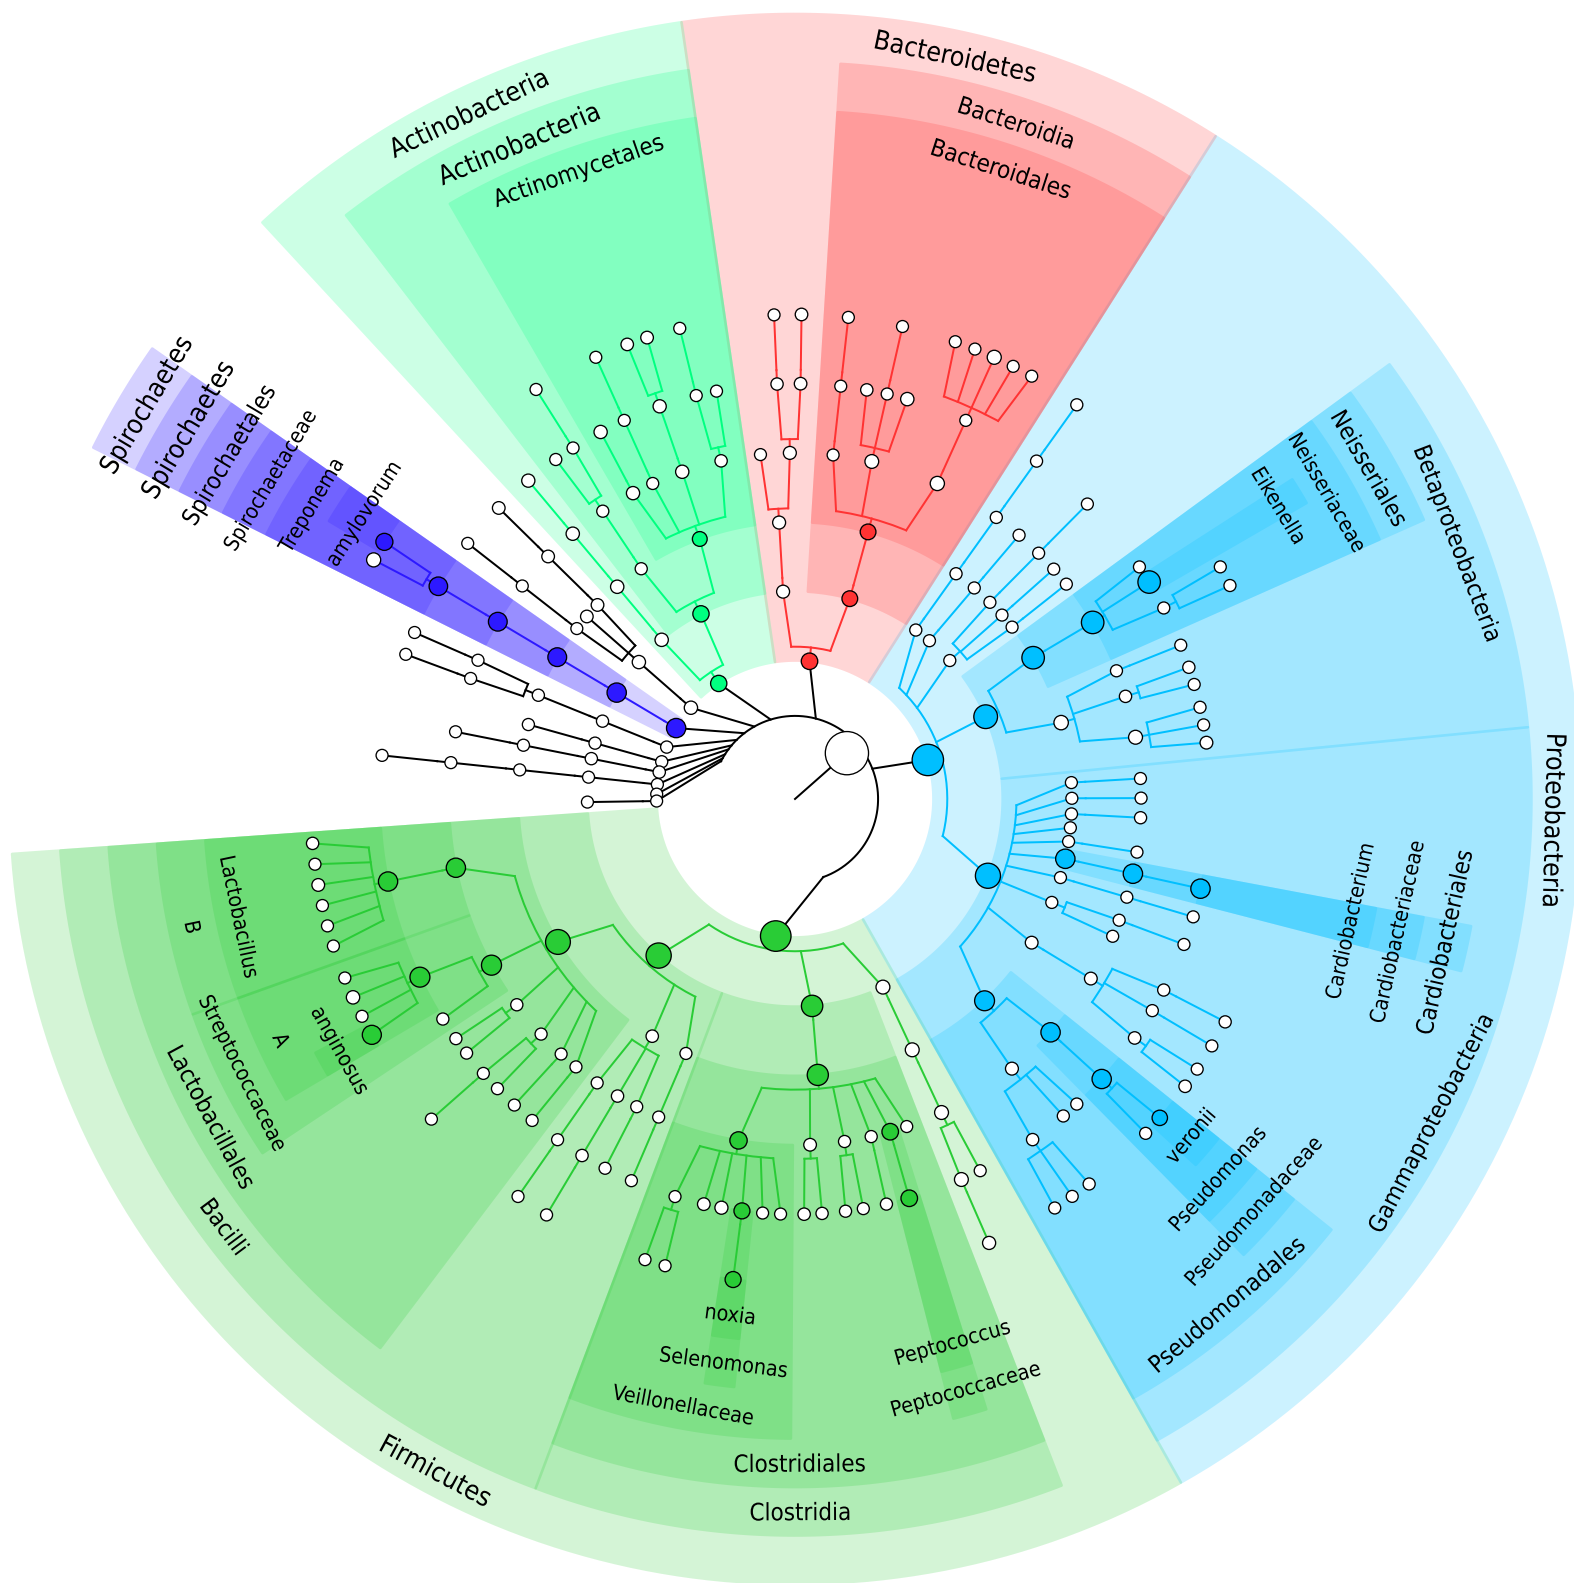

Supplement: FigS2.pdf [file FigS2.pdf]
