# Supplementary material for: Compact graphical representation of phylogenetic data and metadata with GraPhlAn
Source: PeerJ journal article supplement (doi:10.7717/peerj.1029), 2015-06-18

- A: IncertaeSedis
- B: IncertaeSedis
- C: Peptoniphilus
- D: Anaerococcus
- E: Finegoldia
- F: Streptococcus anginosus
- G: Lactobacillaceae
- H: Lactobacillus
- I: Lactobacillus reuteri
- J: Lactobacillus acidophilus
- K: Lactobacillus iners
- L: Lactobacillus crispatus
- M: Lactobacillus jensenii
- N: Aerococcaceae
- O: Aerococcus
- P: Corynebacteriaceae
- Q: Bifidobacteriales
- R: Bifidobacteriaceae
- S: Gardnerella vaginalis

# STM

- ACTINOBACTERIA
- BACTEROIDETES
- FIRMICUTES
- FUSOBACTERIA

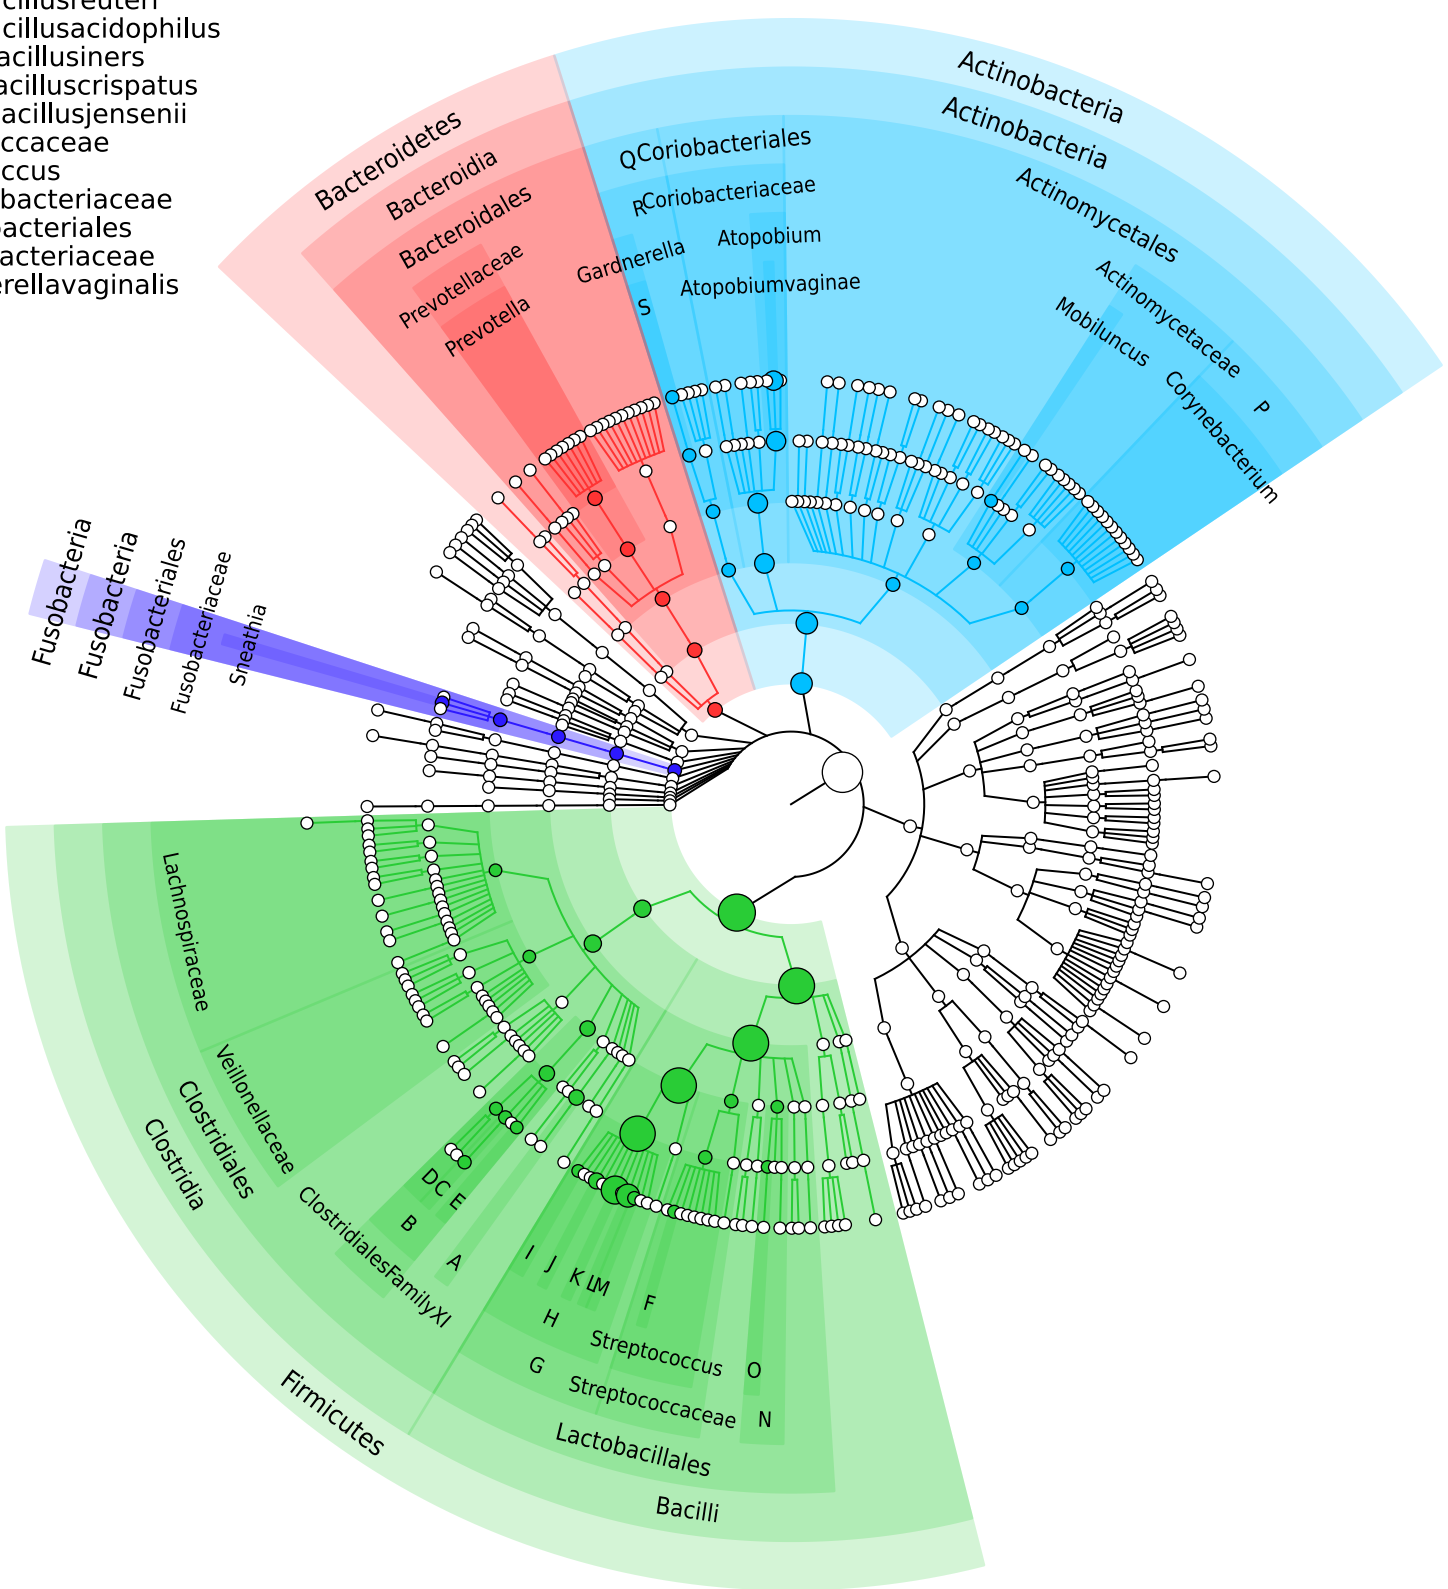

Supplement: FigS3.pdf [file FigS3.pdf]
